# Supplementary material for: Global Gene Expression Analysis of Murine Limb Development
Source: PLoS One. 2011 Dec 9;6(12):e28358. doi: 10.1371/journal.pone.0028358 (PMC3235105; doi:10.1371/journal.pone.0028358)
Supplement: Table S5 — Forelimb and Hindlimb up-regulated transcripts. (XLSX) [file pone.0028358.s008.xlsx]

## Sheet: fore_vs_hind.analysis.txt
Table S5. Forelimb and Hindlimb up-regulated transcripts. The putative function, expression pattern and KO phenotype of each transcript was examined in Pubmed, MGI (http://www.informatics.jax.org/phenotypes.shtml), and Visigene (http://genome.ucsc.edu/cgi-bin/hgVisiGene). For genes with KO mice available, the most descriptive reference is cited. Abbreviations: Musculoskeletal (MSK), Yes (Y), Norm…
				logFC
No.		Gene Symbol		E9.5	E10.5	E11.5	E12.5	E13.5		Putative Function		KO phenotype		Ref		In situ		MSK Function
Forelimb Upregulated Genes
1		Scn2b		4.403	-0.039	-0.056	-0.083	-0.002		sodium channel		behavior/nervous system		[124]		NA		N
2		Hoxb5		4.167	1.392	0.997	1.583	1.532		Transcription factor		specifies the position of the limb		[18]		Y		Y
3		Hoxc5		3.222	2.106	2.627	3.121	2.01		Transcription factor		skeletal defects; patterning of the rib cage		[15]		Y		Y
4		Cdx1		2.818	0.329	0.121	-0.091	0.023		Transcription factor		skeletal defects		[12]		Y		Y
5		Tbx5		2.808	3.343	3.349	3.516	2.839		Transcription factor		essential for forelimb initiation and patterning of the limb		[49]		Y		Y
6		Gal		2.727	0.796	0.523	0.429	0.054		signaling molecule		nervous system defects, no reported limb phenotype		[42]		NA		N
7		Figf		2.509	0.476	0.869	0.432	0.627		growth factor		no reported limb phenotype		[5]		Y		N
8		Hoxb6		2.432	-0.015	0.017	0.641	0.519		Transcription factor		specifies the position of the limb		[18]		Y		Y
9		Prl2c2		2.406	-0.048	-0.014	-0.07	0.017		growth factor/signaling molecule		unknown				NA
10		Gata5		2.314	0.16	0.003	-0.075	0.011		Transcription factor		abnormal reproduction		[43]		NA		N
11		E130012A19Rik		2.208	0.299	-0.011	0.186	-0.567		novel		unknown				NA
12		Src		2.154	0.061	0.122	-0.1	-0.281		ATP binding		abnormal limbs		[78]		NA		Y
13		Alx1		2.125	0.442	0.768	1.55	0.998		Transcription factor		craniofacial and skeletal defects--limb defects as double KO with Alx4		[64]		NA		Y
14		Hoxa4		2.083	0.863	0.136	0.313	0.625		Transcription factor		skeletal/limb defects		[72]		Y		Y
15		Etv2		1.919	0.184	-0.155	-0.187	-0.111		Transcription factor		perinatal lethal by E10.5, abnormal heart and vascular		[8]		Y		EL
16		Jmjd5		1.747	0.01	-0.126	0.012	-0.056		novel		unknown				NA
17		Cpz		1.721	0.116	-0.076	-0.153	0.148		carboxypepsidase		unknown				NA
18		Stbd1		1.708	-0.054	0.409	0.573	0.663		novel		unknown				NA
19		Ppm1m		1.705	-0.058	0.005	0.022	-0.103		phosphotase		unknown				NA
20		Khsrp		1.671	0.281	-0.115	0.023	-0.001		mRNA splicing		unknown				NA
21		Rdh10		1.623	0.089	0.171	-0.182	0.339		metabolism		abormal limb morphology		[125]		Y		Y
22		Egr1		1.621	0.012	-0.342	0.789	0.386		Transcription factor		low bone mass		[10]		Y		Y
23		Adamts1		1.601	0.108	-0.313	0.052	0.105		extracellular matrix		unknown				Y
24		Pkdcc		1.588	0.907	0.308	0.132	-0.2		kinase		delayed ossification; short limbs; cleft palate		[13-14]		NA		Y
25		Lgi2		1.567	-0.024	-0.074	-0.076	0.713		novel		unknown				NA
26		Per1		1.539	0.301	0.13	0.137	-0.023		transcription factor		osteoblast defect		[81]		Y		Y
27		Zfp775		1.521	0.182	0.12	0.177	-0.237		Transcription factor		unknown				NA
28		Scn4b		1.484	0.663	-0.15	-0.01	0.104		sodium channel		unknown				NA
29		Unc5b		1.481	0.089	-0.035	-0.01	-0.24		apoptosis		Perintal lethal by E10		[74]		NA		EL
30		Hoxa5		1.476	0.425	0.306	0.348	0.469		Transcription factor		skeletal/limb defects		[73]		Y		Y
31		Wnt7a		1.475	0.294	-0.01	0.005	-0.337		wnt signaling ligand		required for normal DV and AP patterning of the limb		[28]		Y		Y
32		Snap91		1.425	0.529	0.037	-0.229	0.208		novel		unknown				NA
33		Krt23		1.407	0.148	0.065	0.005	0.019		cytoskeleton		unknown				NA
34		Hgsnat		1.396	-0.017	0.078	-0.046	-0.157		novel		unknown				NA
35		Fam89a		1.366	-0.122	-0.049	-0.161	0.143		novel		unknown				NA
36		Tmbim6		1.338	0.133	0.046	0.094	-0.037		membrane protein		metabolism/nervous system defects		[77]		NA		N
37		Prdm1		1.309	0.052	0.139	0.106	0.028		ion binding		craniofacial; ossification defect		[5]		Y		Y
38		Otud3		1.306	-0.077	-0.003	-0.046	-0.097		novel		unknown				NA
39		Slc18a1		1.278	-0.004	-0.03	-0.06	0.11		transmembrane protein		normal				NA		N
40		Pdgfa		1.258	0.014	0.34	-0.071	0.104		growth factor		embyonic lethal before E10.5; skeletal, muscle and vascular defects		[59]		Y		EL
41		Parvb		1.257	-0.135	-0.101	0.066	-0.101		novel		unknown				NA
42		Col14a1		1.257	-0.142	0.211	-1.096	0.25		extracellular matrix		muscle, skeleton, tendon defects		[63]		NA		Y
43		Sp6		1.248	-0.27	-0.183	0.043	-0.167		Transcription factor		syndactyly/oligodactyly		[9]		Y		Y
44		Echdc1		1.235	-0.023	-0.175	0.086	0.122		novel		unknown				Y
45		Hdac9		1.218	0.326	0.02	-0.008	0.123		chromatin		cardiac hypotrophy		[15]		NA		N
46		Cth		1.209	-0.42	-0.127	0.152	-0.491		catalytic enzyme		muscle/cardiovascular defects		[66]		NA		Y
47		Smarcd2		1.151	0.118	-0.004	0.016	0.044		chromatin		unknown				Y
48		Trpm1		1.151	-0.1	-0.072	-0.101	-0.023		ion transport		eye defects		[61]		NA		N
49		AA667102		1.121	0.048	-0.027	0.098	-0.107		novel		unknown				NA
50		Fut4		1.117	0.258	-0.111	0.206	-0.145		metabolism		immune defects, no reported limb phenotype		[36]		NA		N
51		Bambi		1.117	0.067	0.196	0.042	-0.266		growth factor		no skeletal abnormality		[126]		Y		N
52		Dlx2		1.112	0.062	-0.079	-0.138	-0.138		Transcription factor		craniofacial/skeletal defects		[83]		Y		Y
53		Git1		1.101	0.246	0.029	0.093	-0.09		phosphorylation		respiratory		[46]		NA		N
54		Lrrc16a		1.095	-0.003	0.13	0.003	-0.139		novel		unknown				NA
55		Perp		1.079	0.09	0.136	0.243	0.144		cell junction		no reported limb phenotype		[53]		NA		N
56		Kctd12		1.07	0.268	0.12	0.482	0.259		channel /membrane		unknown				NA
57		Mkl1		1.053	0.139	0.093	-0.212	-0.015		actin binding		cardiovascular defects; perinatal lethal		[57]		NA
58		Phc2		1.042	0.35	0.261	0.055	-0.163		Transcription factor		skeletal and limb defects		[127]		NA		Y
59		Epha3		1.003	-0.168	-0.104	0.019	-0.306		receptor		muscle and nerve defects		[30]		NA		Y
60		Cxcl13		0.802	-0.312	-0.084	0.18	2.373		novel		immune/hematopoietic defects		[128]		NA		N
61		1110032A04Rik		0.658	2.087	0.228	0.401	-0.005		novel		unknown				NA
62		Ly6c1		0.321	0.008	1.909	0.81	0.468		novel		unknown				NA
63		Socs2		0.243	0.496	0.615	1.119	0.746		growth factor		skeletal and limb defects		[129]		NA		Y
64		Prox1		0.225	0.018	0.143	1.1	0.529		transcription factor		perinatal lethal by E14.5		[290]		Y		EL
65		Smpx		0.165	-0.021	-0.169	-0.444	1.091		cytoskeleton		no reported limb phenotype		[130]		NA		N
66		Sdpr		0.08	-0.436	0.177	-0.764	1.09		novel		unknown				NA
67		Rpl39l		-0.054	-0.064	0.109	-0.244	1.093		novel		unknown				NA
68		Fndc1		-0.068	-0.352	0.908	0.097	1.565		novel		unknown				NA
69		Phex		-0.078	-0.031	0.89	0.205	1.703		membrane protein		skeltal and limb defects		[131]		NA		Y
70		Kbtbd10		-0.108	0.102	-0.013	1.034	1.087		novel		unknown				NA
71		Tceal7		-0.153	-0.282	0.699	1.342	1.325		Transcription factor		unknown				NA
72		Sim2		-0.158	1.25	0.725	0.676	0.057		Transcription factor		craniofacial and skeletal defects		[132]		Y		Y
73		Angptl1		-0.198	-0.346	0.004	0.583	1.168		receptor		no detected abnormalities		[133]		NA		N
74		Cited1		-0.263	0.552	1.003	1.149	0.658		tanscription factor		growth defect		[134]		Y		N
75		Itih5		-0.412	0.095	0.079	0.529	1.104		novel		unknown				NA
76		Matn3		-0.566	-0.171	-0.19	-0.722	1.247		extracellular matrix		skeletal and limb defects		[135]		NA		Y
Hindlimb Upregulated Genes
1		Hoxc10			6.256	5.12	5.462	5.414		transcription factor		skeletal and limb defects		[136]		Y		Y
2		Pitx1			5.482	5.953	5.443	4.888		transcription factor		skeletal and limb defects		[137]		Y		Y
3		Tbx4			5.254	3.305	2.796	3.276		transcription factor		limb defects		[138]		Y		Y
4		Ifi204			3.333	0.929	1.33	1.634		novel		unknown				NA
5		Igf1			2.932	1.492	0.926	-0.035		growth factor		skeletal/limb/muscle defects		[139]		NA		Y
6		E130114P18Rik			2.169	2.169	0.476	-0.003		novel		unknown				NA
7		Hoxc9			1.963	1.72	1.774	1.237		transcription factor		skeletal and limb defects		[16]		Y		Y
8		Mup3			1.43	0.628	-0.046	-0.109		novel		unknown				NA
9		Lrrtm4			1.402	0.011	0.109	0.276		novel		unknown				NA
10		5730457N03Rik			0.131	1.809	0.99	0.231		novel		unknown				NA
11		Dmrt2			-0.095	2.039	1.498	1.4		transcription factor		skeletal and limb defects		[140]		Y		Y
